# Supplementary material
Source: publisher site journal article supplement (https://www.degruyterbrill.com/publication/isbn/9783486700107/downloadAsset/9783486700107_Errata.pdf)
Supplement: Supplementary file 1 [file 9783486700107_Errata.pdf]

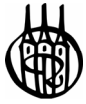

## ERRATA

Bei der Herstellung des Buches ist uns im Inhaltsverzeichnis ein Fehler unterlaufen. Das korrekte Inhaltsverzeichnis finden Sie auf den beiden nachfolgenden Seiten.

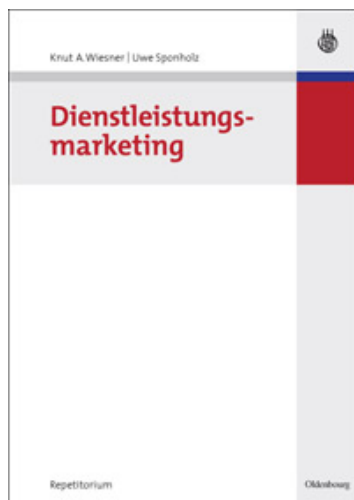

Knut Wiesner, Uwe Sponholz

**Dienstleistungsmarketing**

2007. 230 Seiten, Broschur

€ 27,80

ISBN 978-3-486-58209-3

Reihe: WiSorium - Wirtschafts- und  
Sozialwissenschaftliches Repetitorium,  
(Reihenherausgeber: Michael Bernecker)

München, den 29.08.2007

Wirtschafts- und Sozialwissenschaftliches Lektorat  
Oldenbourg Wissenschaftsverlag GmbH

## **Inhaltsverzeichnis**

|                                                                                     |            |
|-------------------------------------------------------------------------------------|------------|
| <b>Vorwort .....</b>                                                                | <b>V</b>   |
| <b>Inhaltsverzeichnis.....</b>                                                      | <b>VII</b> |
| <b>Abbildungsverzeichnis.....</b>                                                   | <b>IX</b>  |
| <b>1. Einführung ins Dienstleistungsmarketing.....</b>                              | <b>1</b>   |
| 1.1 Abgrenzung von Sachleistungen, Dienstleistungen und Serviceleistungen.....      | 5          |
| 1.2 Arten von Dienstleistungen und ihre Besonderheiten.....                         | 6          |
| 1.3 Auswirkungen auf das Marketing von Dienstleistungen .....                       | 9          |
| <b>2. Marketingziele (normatives Marketing) .....</b>                               | <b>13</b>  |
| 2.1 Marketingziele als Teilziele der Unternehmensziele .....                        | 15         |
| 2.2 Marketingziele für institutionelle/alleinstehende Dienstleistungen .....        | 18         |
| 2.3 Marketingziele für funktionale bzw. produktergänzende Dienstleistungen ....     | 20         |
| <b>3. Strategisches Marketing.....</b>                                              | <b>25</b>  |
| 3.1 Strategieentwicklung .....                                                      | 26         |
| 3.2 Standardstrategien.....                                                         | 28         |
| 3.3 Strategien für institutionelle Dienstleistungen.....                            | 36         |
| 3.4 Strategien für funktionelle Dienstleistungen .....                              | 37         |
| <b>4. Informationsgewinnung, Analyse und Bewertung .....</b>                        | <b>45</b>  |
| 4.1 SWOT-Analyse/Strategische Situationsanalyse .....                               | 49         |
| 4.2 Marktforschung - Marketingforschung .....                                       | 57         |
| 4.3 Qualitätsmessung und -bewertung .....                                           | 66         |
| 4.4 Databasemanagement.....                                                         | 68         |
| <b>5. Operatives und taktisches Marketing sowie typenspezifische Aufgaben .....</b> | <b>73</b>  |
| 5.1 Marketingprozess.....                                                           | 74         |
| 5.2 Instrumente institutionellen Marketings (8 P) .....                             | 75         |
| 5.2.1 product/service .....                                                         | 78         |
| 5.2.2 process management .....                                                      | 95         |
| 5.2.3 physical facilities .....                                                     | 97         |
| 5.2.4 price.....                                                                    | 100        |
| 5.2.5 promotion.....                                                                | 111        |

---

|       |                                                    |     |
|-------|----------------------------------------------------|-----|
| 5.2.6 | public voice .....                                 | 128 |
| 5.2.7 | personnel.....                                     | 131 |
| 5.2.8 | place.....                                         | 135 |
| 5.3   | Instrumente funktionellen Marketings (5 p).....    | 139 |
| 5.3.1 | programm .....                                     | 141 |
| 5.3.2 | service-engineering - Dienstleistungswicklung..... | 158 |
| 5.3.3 | price.....                                         | 186 |
| 5.3.4 | place.....                                         | 199 |
| 5.3.5 | promotion.....                                     | 203 |
| 6.    | Marketing-Controlling/-Audit.....                  | 211 |
